# Supplementary material for: Infections caused by the Delta variant (B.1.617.2) of SARS-CoV-2 are associated with increased viral loads compared to infections with the Alpha variant (B.1.1.7) or non-Variants of Concern.
Source: Research Square preprint supplement (doi:10.21203/rs.3.rs-777577/v1), 2021-08-04
Supplement: Supplementary file 1 [file 64ba019162da6fff0d9e697a.pdf]

## Supplementary material

**A**

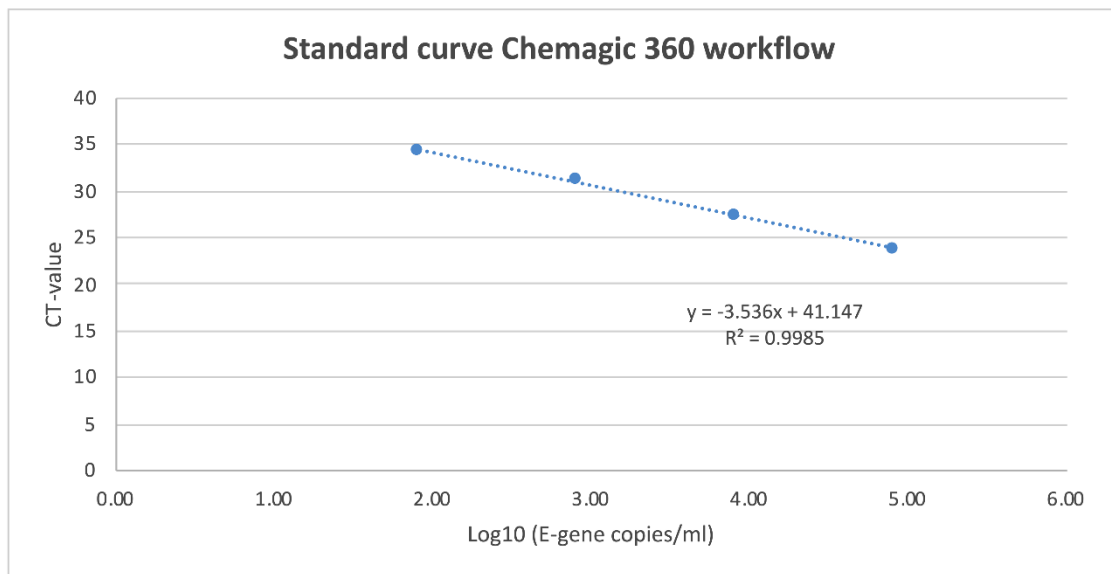

**B**

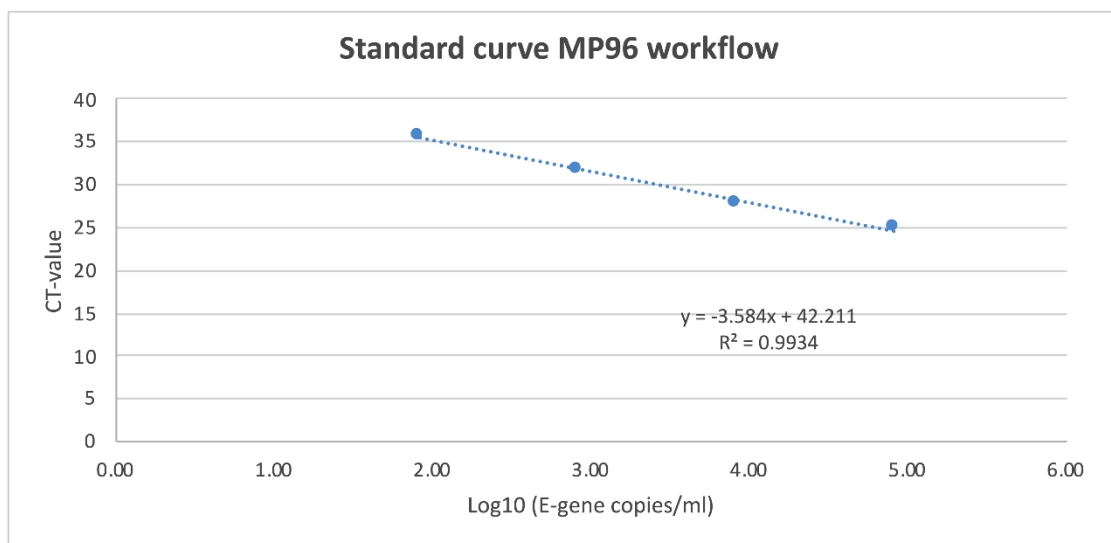

**Figure S1. A.** Standard curve of the CT value in function of log10 E-gene copies/ml for RNA extraction using the Chemagic 360 (Perkin-Elmer). **B.** Standard curve of the CT value in function of log10 E-gene copies/ml for RNA extraction using the MagnaPure 96 (Roche). The standard curve was based on 4 measurements per sample with a known viral load that was tested. The equation for the Chemagic 360 workflow was used to convert CT values to viral loads as the majority of samples were tested using this workflow.

**A**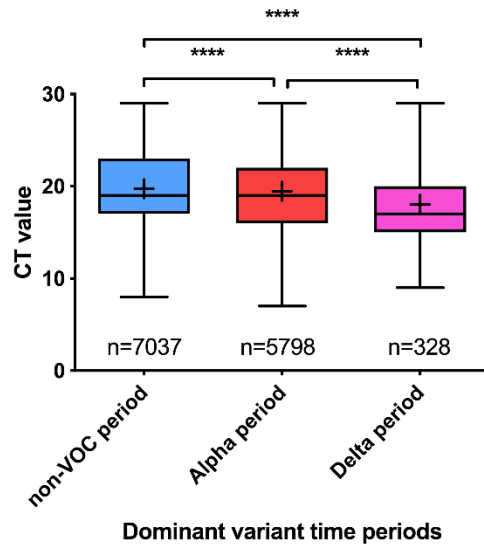**B**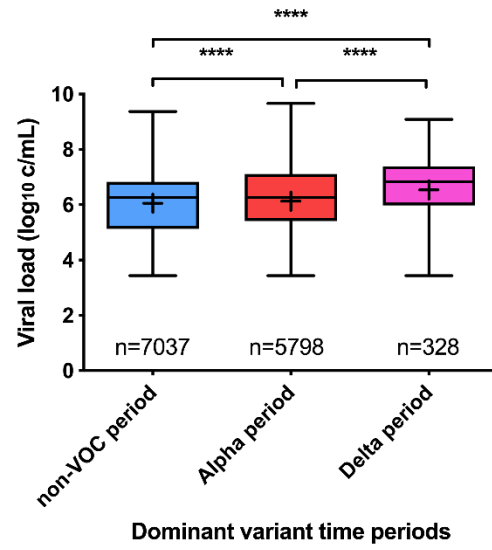

**Figure S2.** CT values (A) and viral loads (B) per time period dominated by non-VOC (Dec 2020 – Feb 2020), Alpha (Mar 2020 – Jun 2020) and Delta (Jul 2020) SARS-CoV-2 variants for samples <CT30. Ns: not significant\*\*\*\*:  $p < 0.0001$ .
